# Supplementary material
Source: PubMed Central journal article supplement (PMC8442230)
Supplement: sj-pdf-1-jic-10.1177_08850666211021745.pdf [file sj-pdf-1-jic-10.1177_08850666211021745.pdf]

Appendix A: Positive cultures within first 48 hours of admission

| <b>Patient</b> | <b>Infection</b>                                                                  |
|----------------|-----------------------------------------------------------------------------------|
| 1              | E. coli (urine)                                                                   |
| 2              | E. coli (urine), E. coli (ET aspirate)                                            |
| 3              | E. coli (urine)                                                                   |
| 4              | E. faecalis (CVC)                                                                 |
| 5              | MRSA (ET aspirate), E. coli (ET aspirate)                                         |
| 6              | MSSA (sputum)                                                                     |
| 7              | MSSA (sputum)                                                                     |
| 8              | S. pneumoniae (ET aspirate)                                                       |
| 9              | S. pneumoniae (ET aspirate), H. influenzae                                        |
| 10             | S. pneumoniae (ET aspirate), H. influenzae (ET aspirate), S. aureus (ET aspirate) |
