# Supplementary material
Source: PubMed Central journal article supplement (PMC8442230)
Supplement: sj-pdf-2-jic-10.1177_08850666211021745.pdf [file sj-pdf-2-jic-10.1177_08850666211021745.pdf]

## Appendix B: Antibiotic Days of Therapy and Exposures

---

| <b>Antibiotic</b>             | <b>Days of Therapy Mean (SD)</b> | <b>Count (%)</b> |
|-------------------------------|----------------------------------|------------------|
| Vancomycin                    | 7 (6.3)                          | 97 (77.6%)       |
| Cefepime                      | 8.4 (7.2)                        | 84 (67.2%)       |
| Ceftriaxone                   | 3.9 (3.2)                        | 66 (52.8%)       |
| Azithromycin                  | 2 (1.3)                          | 41 (32.8%)       |
| Meropenem                     | 4.9 (4.3)                        | 30 (24.0%)       |
| Piperacillin-tazobactam       | 4.8 (3.5)                        | 28 (22.4%)       |
| Cefazolin                     | 6.4 (5.7)                        | 27 (21.6%)       |
| Levofloxacin                  | 3.6 (2.3)                        | 9 (7.2%)         |
| Metronidazole                 | 5.1 (4.8)                        | 8 (6.4%)         |
| Ampicillin                    | 9.7 (9)                          | 7 (5.6%)         |
| Ertapenem                     | 5.7 (3.3)                        | 6 (4.8%)         |
| Doxycycline                   | 5.8 (5.7)                        | 6 (4.8%)         |
| Trimethoprim-Sulfamethoxazole | 15.3 (22.7)                      | 6 (4.8%)         |
| Ceftazidime                   | 6.6 (4.3)                        | 5 (4.0%)         |
| Ampicillin-Sulbactam          | 6.8 (1.3)                        | 5 (4.0%)         |
| Linezolid                     | 5.4 (2.9)                        | 5 (4.0%)         |
| PO Vancomycin                 | 8.2 (2.8)                        | 4 (3.2%)         |
| Amoxicillin-Clavulanate       | 2.7 (2.1)                        | 3 (2.4%)         |
| Ciprofloxacin                 | 9 (13)                           | 3 (2.4%)         |
| Ceftaroline                   | 7 (4.6)                          | 3 (2.4%)         |
| Clindamycin                   | 2                                | 2 (1.6%)         |
| Aztreonam                     | 5.5                              | 2 (1.6%)         |
| Amoxicillin                   | 2                                | 1 (0.8%)         |
| Gentamicin                    | 1                                | 1 (0.8%)         |
| Penicillin-V                  | 17                               | 1 (0.8%)         |
| Ceftolozane-Tazobactam        | 5                                | 1 (0.8%)         |
| Amikacin                      | 1                                | 1 (0.8%)         |
| Imipenem-Cilastatin           | 31                               | 1 (0.8%)         |
| Avibactam-Ceftazidime         | 1                                | 1 (0.8%)         |
| Cephalexin                    | 4                                | 1 (0.8%)         |
| Daptomycin                    | 2                                | 1 (0.8%)         |

---
